# Supplementary material for: International airport emissions and their impact on local air quality: Chemical speciation of ambient aerosols at Madrid-Barajas Airport during AVIATOR Campaign
Source: Copernicus journal article supplement (doi:10.5194/egusphere-2023-2197), 2023-10-06
Supplement: Supplementary file 2 [file egusphere-2023-2197-supplement.pdf]

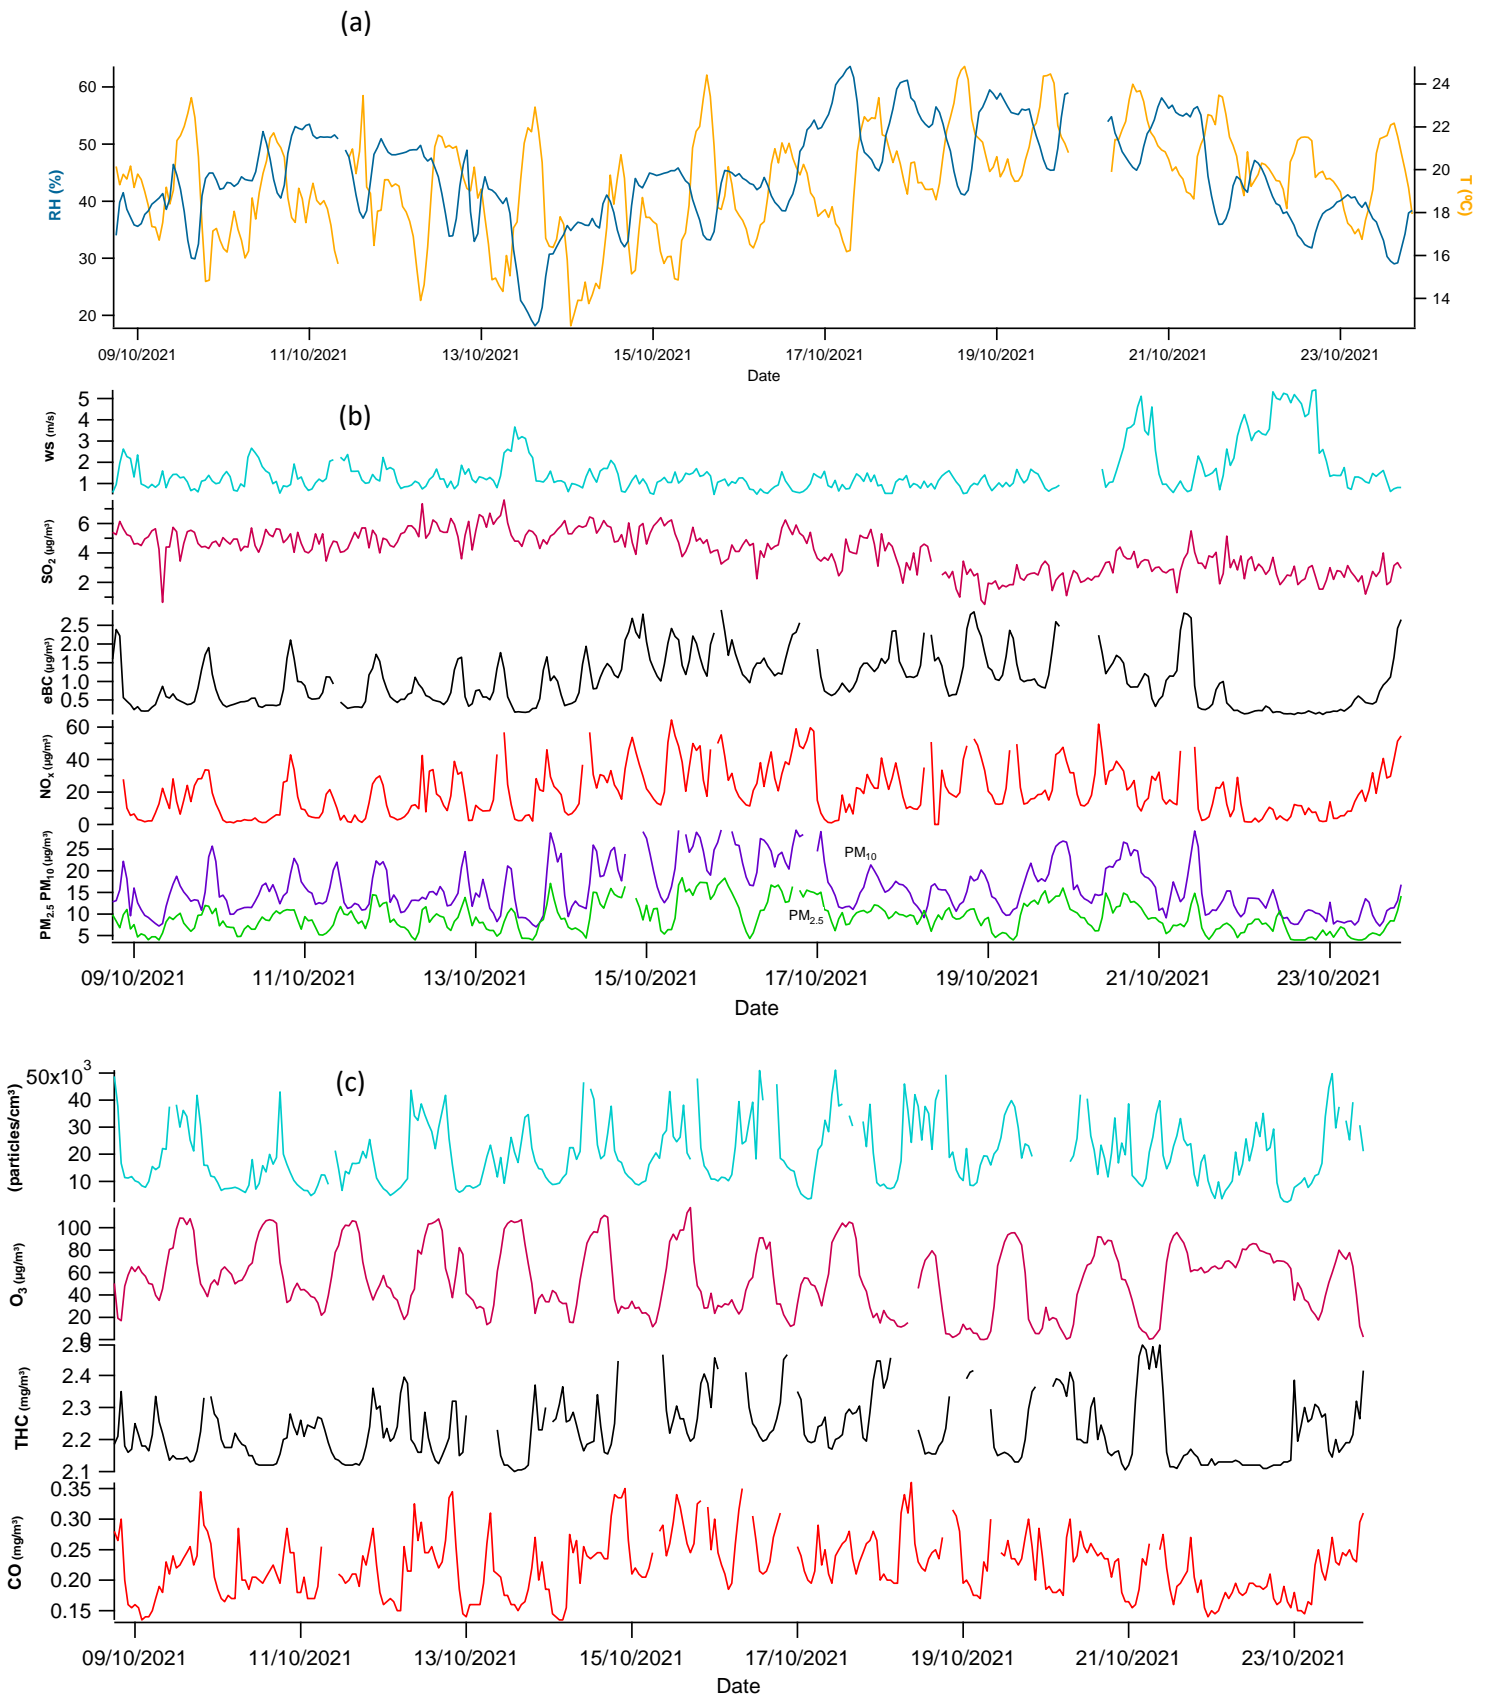

**Figure S1. Meteorology (a), Time series of gases and particles measured at Madrid-Barajas airport during autumn campaign (WP4) of AVIATOR (b) & (c)**

| Unit         | Species           | Mean  | SD   | Min   | Max  |
|--------------|-------------------|-------|------|-------|------|
| <b>µgm-3</b> | eBC               | 1.07  | 0.7  | 0.11  | 2.9  |
|              | NO <sub>x</sub>   | 22.7  | 15.3 | <DL   | 64.3 |
|              | SO <sub>2</sub>   | 4.1   | 1.3  | 0.5   | 7.5  |
|              | O <sub>3</sub>    | 53.9  | 30.3 | 0.15  | 118  |
|              | PM <sub>2.5</sub> | 9.35  | 3.4  | 4     | 18.4 |
|              | PM <sub>10</sub>  | 16.43 | 5.6  | 7     | 29.4 |
|              | SV-OOA            | 1.6   | 1.02 | 0.03  | 4.3  |
|              | AlkOA             | 0.64  | 0.27 | 0.009 | 1.19 |
|              | MO-OOA            | 2.35  | 1.09 | 0.22  | 4.5  |
| <b>mgm-3</b> | CO                | 0.23  | 0.04 | 0.13  | 0.36 |
|              | THC               | 2.3   | 0.09 | 2.1   | 2.5  |
| <b>°C</b>    | Temperature       | 19.4  | 2.4  | 12    | 24.8 |
| <b>m/s</b>   | WS                | 1.5   | 1    | 0.48  | 5.4  |

**Table S1. statistical details of meteorology, gases, particles and obtained factors concentrations for the entire campaign.**
