# Supplementary material for: International airport emissions and their impact on local air quality: Chemical speciation of ambient aerosols at Madrid-Barajas Airport during AVIATOR Campaign
Source: Copernicus journal article supplement (doi:10.5194/egusphere-2023-2197), 2023-10-06
Supplement: Supplementary file [file egusphere-2023-2197-AC1-supplement.pdf]

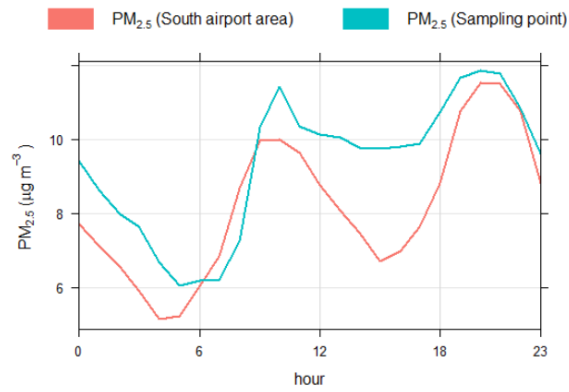

**Figure S3.** The diurnal pattern of PM<sub>2.5</sub> concentrations, measured in micrograms per cubic meter, shows variations between a sampling point and the southern area of the airport, which are approximately 6km apart during autumn campaign (WP4) of AVIATOR.

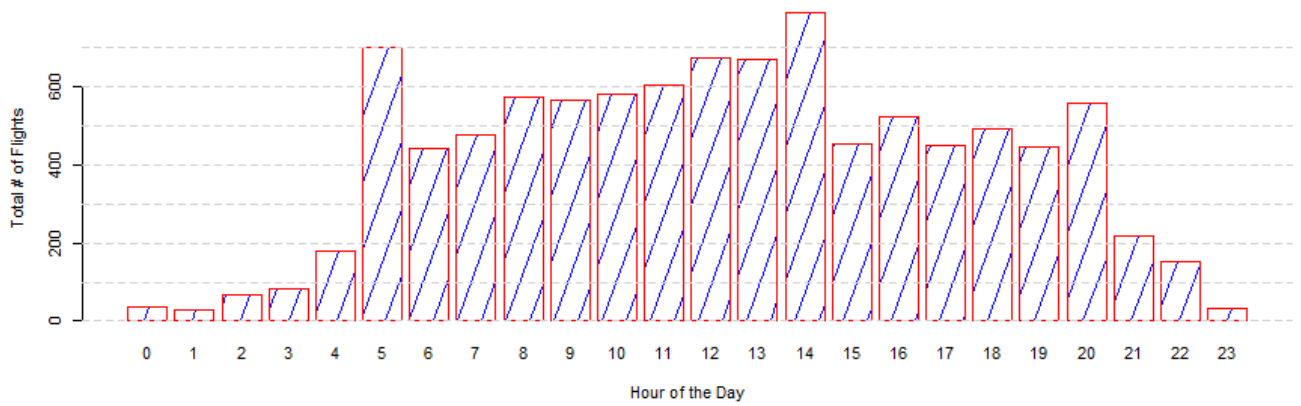

**Figure S2.** Total number of flights per hour counted at Madrid-Barajas airport during autumn campaign (WP4) of AVIATOR

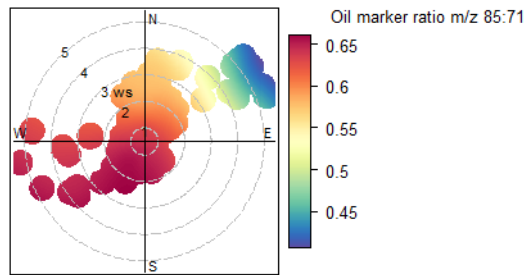

Figure S4. Bivariate polar plots of lubrication oil ratio measured by AMS ratios at the Madrid-Barajas International Airport during autumn campaign (WP4) of AVIATOR.

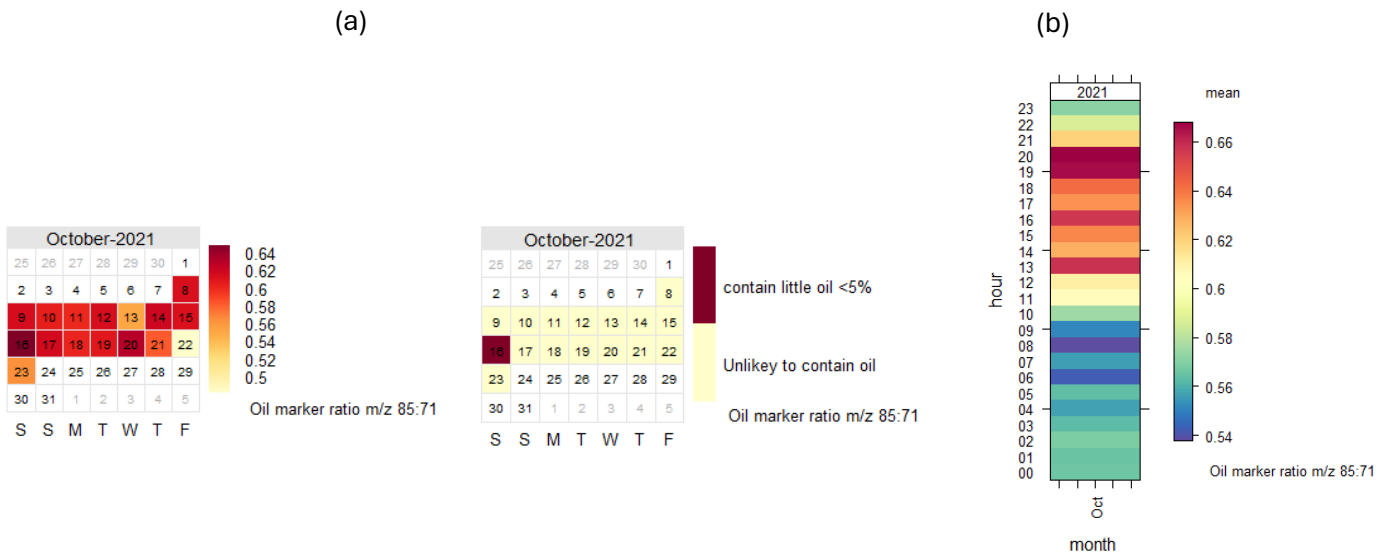

Figure S5. Calendar plots for lubrication oil ratio with annotations highlighting those days where the ratio of lubrication oil > 0.66 (a), Hour of the day analysis for the lubrication oil ratio during autumn campaign (WP4) of AVIATOR (b)
