# Supplementary material for: International airport emissions and their impact on local air quality: Chemical speciation of ambient aerosols at Madrid-Barajas Airport during AVIATOR Campaign
Source: Copernicus journal article supplement (doi:10.5194/egusphere-2023-2197), 2023-10-06
Supplement: Supplementary file [file egusphere-2023-2197-AC2-supplement.pdf]

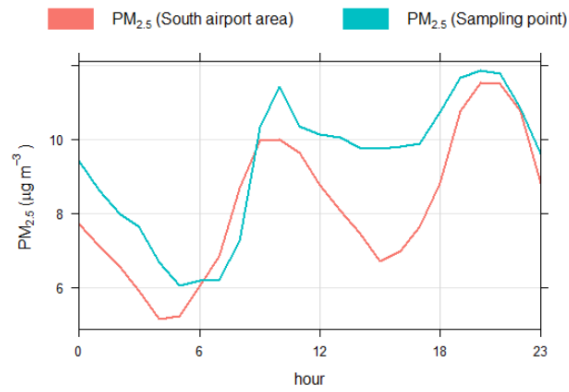

Figure S3. The diurnal pattern of PM<sub>2.5</sub> concentrations, measured in micrograms per cubic meter, shows variations between a sampling point and the southern area of the airport, which are approximately 6km apart during autumn campaign (WP4) of AVIATOR.

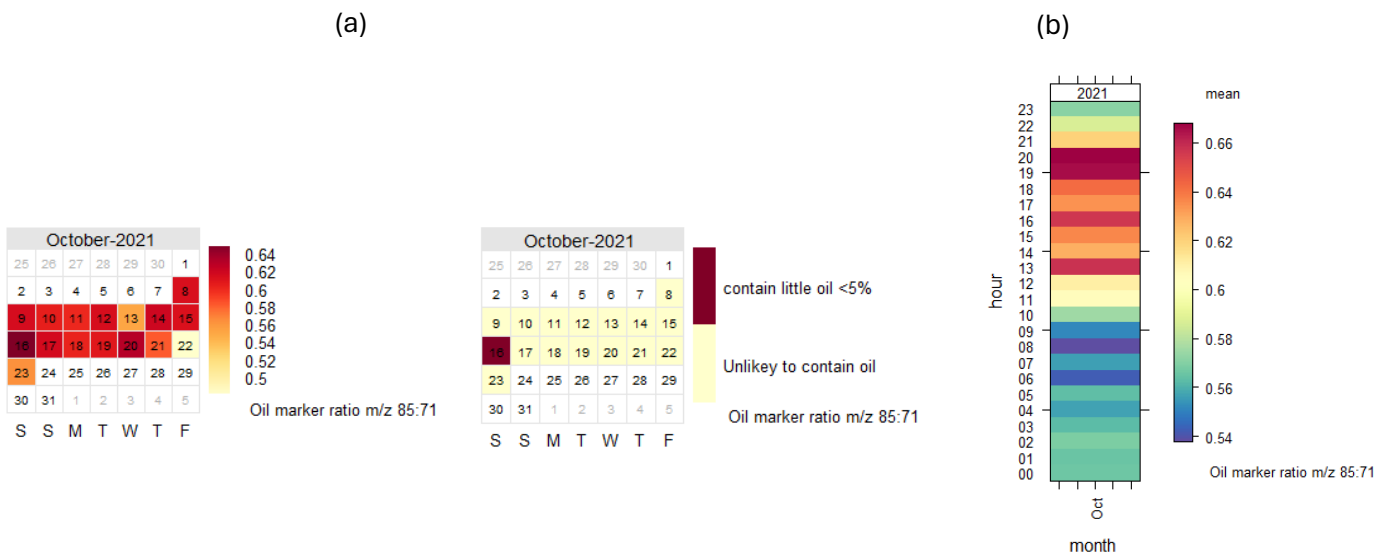

Figure S5. Calendar plots for lubrication oil ratio with annotations highlighting those days where the ratio of lubrication oil > 0.66 (a), Hour of the day analysis for the lubrication oil ratio during autumn campaign (WP4) of AVIATOR (b)

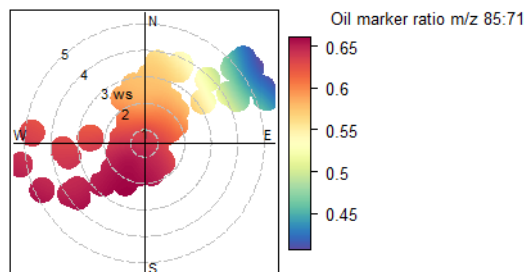

**Figure S4. Bivariate polar plots of lubrication oil ratio measured by AMS ratios at the Madrid-Barajas International Airport during autumn campaign (WP4) of AVIATOR.**

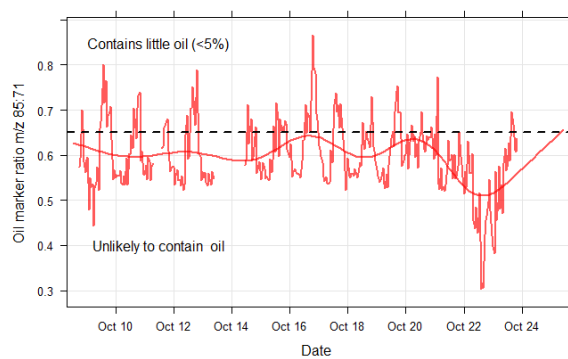

**Figure 3. Temporal variability of lubrication oil fraction in total aerosol mass obtained from AMS measurements.**

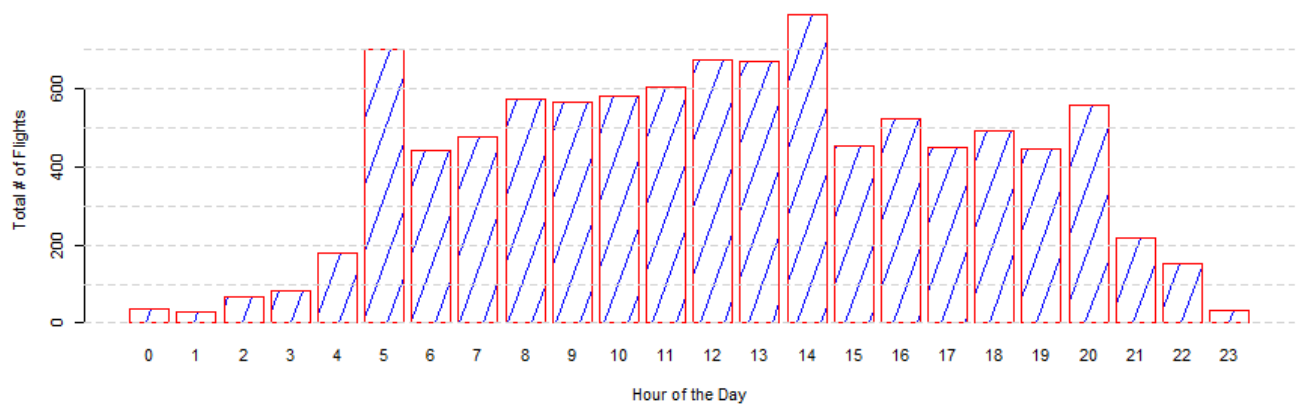

**Figure S2. Total number of flights per hour counted at Madrid-Barajas airport during autumn campaign (WP4) of AVIATOR**
